# Supplementary material
Source: publisher figshare collection journal article supplement (https://karger.figshare.com/ndownloader/files/21961185)
Supplement: Supplementary file 1 [file 21961185]

| **Patient** | **First Aura episode** | **CT** | **MRI** | **MRA** | **Result** | **Notes** | **Neurological Examination** | **HU Required examinations** |
| --- | --- | --- | --- | --- | --- | --- | --- | --- |
| Patient 1 | Y | Y | N | N | Normal | - |  | None |
| Patient 2 | N | Y | N | N | Normal | - |  | MRI+MRA |
| Patient 3 | Y | Y | N | N | Normal | - |  | MRI+MRA |
| Patient 4 | N | N | N | N | Normal | - |  | MRI+MRA |
| Patient 5 | Y | Y | N | N | Normal | - |  | MRI+MRA |
| Patient 6 | Y | N | N | N | Normal | - |  | None |
| Patient 7 | Y | Y | N | N | Normal | - |  | MRI+MRA Duplex Ultrasound |
| Patient 8 | N | N | N | N | Normal | - |  | MRI+MRA |
| Patient 9 | N | N | Y | N | Normal |  | Visual Blurring | None |
| Patient 10 | Y | Y | N | N | Normal | - |  | None |
| Patient 11 | Y | N | N | N | Normal | - |  | MRI+MRA |
| Patient 12 | Y | Y | Y | Y | Normal | - | Diplopia | Duplex Ultrasound |
| Patient 13 | Y | Y | Y | Y | Brain calcification | - | Diplopia | None |
| Patient 14 | Y | Y | N | N | Normal | - |  | MRI+MRA |
| Patient 15 | Y | Y | N | N | Normal | - |  | MRI+MRA |
| Patient 16 | Y | Y | Y | Y | Normal | Hemiplegic Migraine | Face & U/L limb weakness | Duplex Ultrasound |

**Figura S1.** Clinical assessment and instrumental investigation performed in ED and in HU for all patients with migraine with aura.
